# Supplementary material for: Methylation Allelic Polymorphism (MAP) in Chorionic Gonadotropin β5 (CGB5) and Its Association with Pregnancy Success
Source: PubMed Central journal article supplement — J Clin Endocrinol Metab. 2010 Oct 20;96(1):E199–207. doi: 10.1210/jc.2010-1647 (PMC3046612; doi:10.1210/jc.2010-1647), 2010-10-20

## SUPPLEMENTAL DATA

**Supplemental Table 1.** Primers used for various PCR and re-sequencing applications

| Primer                                                                                         | Label at<br>Figures | Sequence 5' - 3'                   | Product<br>size (bp) | Reference |
|------------------------------------------------------------------------------------------------|---------------------|------------------------------------|----------------------|-----------|
| <i>Analysis of genomic DNA (Fig. 1b,c)</i>                                                     |                     |                                    |                      |           |
| <b>PCR primers</b>                                                                             |                     |                                    |                      |           |
| <i>CGB5</i> long range PCR                                                                     |                     |                                    |                      |           |
| CGB5_long_F                                                                                    | A                   | CAGGAAAGCCTCAAGTAGAGGC             | 1757                 | 1         |
| CGB5_long_R                                                                                    | B                   | CGCTCGACGATGTTTTCTATTTT            |                      | 1         |
| <i>CGB8</i> long range PCR                                                                     |                     |                                    |                      |           |
| CGB8_long_F                                                                                    | C                   | CACGCCTGTAATTGTCGGAGGCTG<br>T      | 8384                 | 1         |
| CGB8_long_R                                                                                    | D                   | GAAAAGAGAGTGAAGATGGGGGA<br>CGAC    |                      | 1         |
| <i>CGB8</i> nested PCR                                                                         |                     |                                    |                      |           |
| CGB8_nest_F                                                                                    | E                   | TCCTTGGATGCCCATGTC                 | 1604                 | 1         |
| CGB8_nest_R                                                                                    | F                   | TCTCCAGATCAACTCTCATGGAT            |                      | 1         |
| <b>Re-sequencing primers</b>                                                                   |                     |                                    |                      |           |
| <i>CGB5</i> gene                                                                               |                     |                                    |                      |           |
| CGB5_F_seq                                                                                     | I                   | GACCCACCATAGGCAGAG                 |                      | 2         |
| CGB5_R_seq                                                                                     | J                   | CCTCCTTCCACAGCTCACAC               |                      | 2         |
| <i>CGB8</i> gene                                                                               |                     |                                    |                      |           |
| CGB8_F_seq                                                                                     | K                   | GTCACGCTCCTCCAGAAAGA               |                      | 2         |
| CGB8_R_seq                                                                                     | L                   | AGCACCTTTCTCGGGTCAC                |                      | 3         |
| <i>Analysis of mRNA transcripts (Fig. 2b)</i>                                                  |                     |                                    |                      |           |
| cDNA amplification                                                                             |                     |                                    |                      |           |
| CGB5F                                                                                          | O                   | AGCACTTTGCTCGGGTCAC                | 791                  | 2         |
| CGB8F                                                                                          | P                   | AGCACCTTTCTCGGGTCAC                |                      | 3         |
| CGB8R                                                                                          | Q                   | GGCCTTTGAGGAAGAGGAGT               |                      | 3         |
| <i>Analysis of promoter methylation of CGB5 gene using methylation-sensitive PCR (Fig. 4a)</i> |                     |                                    |                      |           |
| Met_BS_F                                                                                       | R                   | TGAGTTATCGATTATAGGGGGAGT<br>T      | 557                  | 2         |
| Met_BS_R                                                                                       | S                   | ACCGTAACCCGAACAAAATACTA<br>AAT     |                      | 2         |
| Unmet_BS_F                                                                                     | T                   | AATGAGTTATTGATTATAGGGGGA<br>GTT    | 563                  | 2         |
| Unmet_BS_R2                                                                                    | U                   | AAAAACCATAACCCAAACAAAAT<br>ACTAAAT |                      | 2         |
| Met_BS_Nest_F                                                                                  | V                   | TGAAGTATACGTATTTTCGGGGAT<br>C      | 281                  | 2         |
| Unmet_BS_Nest_F                                                                                | Z                   | ATTTGAAGTATATGTATTTTGGG<br>GATT    | 290                  | 2         |

4 F, forward; R, reverse; Met, methylated target; Unmet, unmethylated target; BS, bisulfite treated target  
5 References: 1 - Hallast et al. 2005 (15); 2 - this study; 3 - Rull et al. 2008 (28)

6

**Supplemental Figure 1.** Karyogram of the RM10 placental tissue indicates monosomy X (Turner syndrome; 45, X).

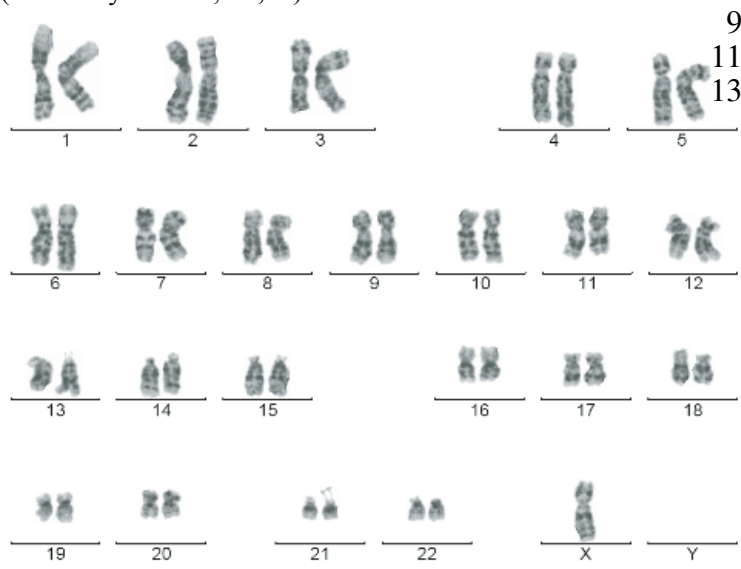

Supplement: jc.2010-1647_1.pdf [file jc.2010-1647_1.pdf]
